# Supplementary material for: Combined Model-Based Prediction for Non-Invasive Prenatal Screening
Source: MDPI journal article supplement (doi:10.3390/ijms232314990), 2022-11-30
Supplement: s1 [file s1]

# Combined Model-Based Prediction for Non-Invasive Prenatal Screening

So-Yun Yang <sup>1,†</sup>, Kyung Min Kang <sup>2,†</sup>, Sook-Young Kim <sup>3</sup>, Seo Young Lim <sup>4</sup>, Hee Yeon Jang <sup>1,2</sup>, Kirim Hong <sup>5</sup>, Dong Hyun Cha <sup>2,5</sup>, Sung Han Shim <sup>1,2,\*</sup> and Je-Gun Joung <sup>1,3,6\*</sup>

- <sup>1</sup> Department of Biomedical Science, College of Life Science, CHA University, Seongnam, Gyunggi-do 13488, Korea
- <sup>2</sup> Center for Genome Diagnostics, CHA Biotech Inc, Seoul 06135, Korea
- <sup>3</sup> CHA Future Medicine Research Institute, CHA Bundang Medical Center, Seongnam, Gyunggi-do 13520, Korea
- <sup>4</sup> Department of Biomedical Engineering, Hankuk University of Foreign Studies, Seoul, Korea
- <sup>5</sup> Department of Obstetrics and Gynecology, CHA Gangnam Medical Center, CHA University, Seoul 06135, Korea
- <sup>6</sup> Institute for Biomedical Informatics, CHA University School of Medicine, CHA University, Seongnam, Republic of Korea.
- \* Correspondence: e-mail@e-mail.com; Tel.:
- † These authors contributed equally to this work

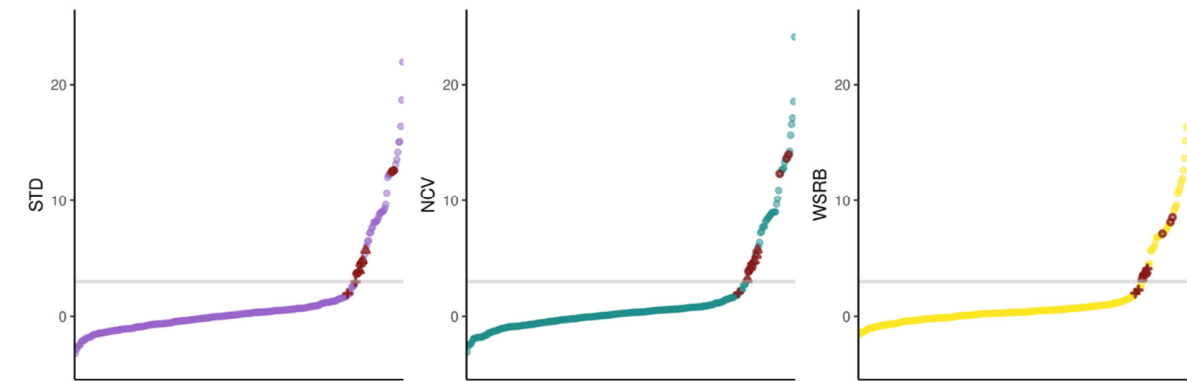

**Figure S1.** Z-scores of chromosomes 13, 18, and 21 calculated using three different methods.

**Table S1.** Number of trisomies predicted using three different methods.

|            | STD | NCV | WSRB | Confirmation |
|------------|-----|-----|------|--------------|
| Trisomy 13 | 5   | 5   | 3    | 0            |
| Trisomy 18 | 9   | 10  | 9    | 5            |
| Trisomy 21 | 33  | 34  | 33   | 33           |
| Total      | 47  | 49  | 45   | 38           |
